# Supplementary material for: hMRP8-ATTAC Mice: A New Model for Conditional and Reversible Neutrophil Ablation
Source: MDPI journal article supplement (doi:10.3390/cells11152346), 2022-07-30
Supplement: s1 [file s1]

## Supplementary Table S1: List of antibodies used for flow cytometry analyses

### Panel 1. Blood, spleen, lung and liver

| Antibody     | Fluorophore | Clone       | Vendor         | Dilution |
|--------------|-------------|-------------|----------------|----------|
| CD45         | BUV395      | 30-F11      | BD Biosciences | 1:200    |
| CD3          | PE-cy7      | 145-2c11    | eBioscience    | 1:200    |
| Siglec F     | BV605       | E50-2440    | BD Biosciences | 1:200    |
| CD11b        | BV786       | M1/70       | BD Biosciences | 1:400    |
| CD11c        | PE          | N418        | eBioscience    | 1:200    |
| Ly6G         | AF700       | 1A8         | Biolegend      | 1:200    |
| Ly6C         | Ef450       | HK1.4       | eBioscience    | 1:400    |
| F4/80        | APC         | BM8         | eBioscience    | 1:200    |
| MHC class II | APCef780    | M5/114.15.2 | eBioscience    | 1:200    |

### Panel 2. Lymph node

| Antibody     | Fluorophore | Clone       | Vendor         | Dilution |
|--------------|-------------|-------------|----------------|----------|
| CD45         | BUV395      | 30-F11      | BD Biosciences | 1:200    |
| Siglec F     | BV605       | E50-2440    | BD Biosciences | 1:200    |
| CD11b        | BV786       | M1/70       | BD Biosciences | 1:400    |
| CD11c        | BV421       | HL3         | BD Biosciences | 1:200    |
| Ly6G         | AF700       | 1A8         | Biolegend      | 1:200    |
| Ly6C         | PEcy7       | HK1.4       | Biolegend      | 1:400    |
| F4/80        | APC         | BM8         | eBioscience    | 1:200    |
| MHC class II | APCef780    | M5/114.15.2 | eBioscience    | 1:200    |
| CD169        | PE          | 3D6.112     | Biolegend      | 1:200    |

### Panel 3. Bone marrow

| Antibody | Fluorophore | Clone    | Vendor         | Dilution |
|----------|-------------|----------|----------------|----------|
| CD11b    | APCef780    | M1/70    | eBioscience    | 1:400    |
| CD115    | BV711       | AFS98    | Biolegend      | 1:200    |
| Ly6G     | AF700       | 1A8      | Biolegend      | 1:200    |
| Ter119   | PE          | TER-119  | Biolegend      | 1:400    |
| CD3      | PE          | 145-2C11 | Biolegend      | 1:400    |
| CD4      | PE          | H129.19  | Biolegend      | 1:400    |
| CD8      | PE          | 53-6.7   | eBioscience    | 1:400    |
| CD19     | PE          | eBio1D3  | eBioscience    | 1:400    |
| Sca1     | BV421       | D7       | Biolegend      | 1:400    |
| CD117    | BV605       | 2B8      | BD Biosciences | 1:200    |
| CD16/32  | BUV395      | 2.4G2    | BD Biosciences | 1:200    |
| CD34     | AF647       | RAM34    | BD Biosciences | 1:100    |

Panel 4. Dimerizer treatment in tumor-bearing hMRP8;ATTAC mice: blood, spleen, lung and tumor

| Antibody | Fluorophore | Clone    | Vendor         | Dilution |
|----------|-------------|----------|----------------|----------|
| CD45     | BUV395      | 30-F11   | BD Biosciences | 1:200    |
| CD3      | PE-cy7      | 145-2c11 | eBioscience    | 1:200    |
| CD11b    | BV786       | M1/70    | BD Biosciences | 1:400    |
| CCR2     | PE          | 475301   | R&D systems    | 1:100    |
| Gr1      | BV421       | RB6-8C5  | Biolegend      | 1:200    |
| F4/80    | APC         | BM8      | eBioscience    | 1:200    |

Panel 5. Dimerizer treatment in tumor-bearing hMRP8;ATTAC mice: blood, spleen, lung and tumor

| Antibody     | Fluorophore | Clone       | Vendor         | Dilution |
|--------------|-------------|-------------|----------------|----------|
| CD45         | BUV395      | 30-F11      | BD Biosciences | 1:200    |
| CD3          | PE-cy7      | 145-2c11    | eBioscience    | 1:200    |
| Siglec F     | PE          | E50-2440    | BD Biosciences | 1:200    |
| CD11b        | BV786       | M1/70       | BD Biosciences | 1:400    |
| CD11c        | BUV737      | HL3         | BD Biosciences | 1:100    |
| CD117        | BV605       | 2B8         | BD Biosciences | 1:100    |
| Ly6G         | AF700       | 1A8         | Biolegend      | 1:200    |
| Ly6C         | Ef450       | HK1.4       | eBioscience    | 1:400    |
| F4/80        | APC         | BM8         | eBioscience    | 1:200    |
| MHC class II | APCef780    | M5/114.15.2 | eBioscience    | 1:200    |
